# Supplementary material
Source: PubMed Central journal article supplement (PMC8405103)
Supplement: NIHMS1728251-supplement-1728251_Sup_tab1.pdf [file NIHMS1728251-supplement-1728251_Sup_tab1.pdf]

**Supplementary Table 1.** RNA tertiary interactions in cryo-EM structure of the full-length *Tetrahymena* ribozyme catalytic core and comparisons with other group I introns

| <b>Region, Residue</b>                  | <b>Tertiary interactions</b>        | <b>Other models with same interactions</b> | <b>Residues adopt different conformations in the cryo-EM structure</b> |
|-----------------------------------------|-------------------------------------|--------------------------------------------|------------------------------------------------------------------------|
| J3/4, A104-U106                         | Minor groove interactions to P6     | 1X8W, 1U6B, 1Y0Q                           | G122 in 1U6B and A114 in 1Y0Q to C255 in cryo-EM                       |
| J5/5a, C124-G126, C197                  | Minor groove interactions to P5     | 1GID, 1HR2, 1X8W                           | A125 in 1HR2 to A125 in cryo-EM                                        |
| TL, A152-A153                           | Minor groove interactions to P6a    | 1GID, 1HR2, 1X8W                           |                                                                        |
| P14, A171                               | A-platform within a base triple     | 1GID, 1HR2, 1X8W                           |                                                                        |
| Metal core, U168, A183-A184, A186, G188 | Minor groove interactions to P4     | 1GID, 1HR2, 1X8W                           | A210 in 1GID and A210G in 1X8W to A210 in cryo-EM                      |
| J6/6a, A218                             | Minor groove interactions to P3     | 1X8W, 1U6B, 1Y0Q                           | A218 in 1GID and 1HR2 form an A-platform to A218 in cryo-EM            |
| J6/7, U259-C262                         | Major groove interactions to P4, P7 | 1X8W, 1U6B, 1Y0Q                           | C260 and U259A in 1X8W to C260 and U259 in cryo-EM                     |
| J8/7, U300                              | Major groove interactions to P3     | 1X8W                                       | U277C in 1X8W to U277 in cryo-EM                                       |
| J8/7, A306                              | Major groove interactions to P7     | 1X8W, 1U6B, 1Y0Q                           | A306 in 1X8W to A306 in cryo-EM                                        |
| P9, A324-A325, G327                     | Minor groove interactions to P5     | 1X8W, 1U6B, 1Y0Q                           | C209 in 1Y0Q to G327 in cryo-EM                                        |
