# Supplementary material
Source: PubMed Central journal article supplement (PMC8405103)
Supplement: NIHMS1728251-supplement-1728251_Sup_tab2.pdf [file NIHMS1728251-supplement-1728251_Sup_tab2.pdf]

**Supplementary Table 2.** Metal ions in cryo-EM structures of the *Tetrahymena* ribozyme including bond lengths, bond angles and comparison with other group I introns

| Metal                                                     | Region                  | The holo L-16 Scal <i>Tetrahymena</i> ribozyme                               |                                                                                                                               | The apo L-21 Scal <i>Tetrahymena</i> ribozyme                                |                                                                                                                               | Other models that have this metal |
|-----------------------------------------------------------|-------------------------|------------------------------------------------------------------------------|-------------------------------------------------------------------------------------------------------------------------------|------------------------------------------------------------------------------|-------------------------------------------------------------------------------------------------------------------------------|-----------------------------------|
|                                                           |                         | Bond length                                                                  | Bond angle                                                                                                                    | Bond length                                                                  | Bond angle                                                                                                                    |                                   |
| <b>P4-J4/5-P5-P5a</b>                                     |                         |                                                                              |                                                                                                                               |                                                                              |                                                                                                                               |                                   |
| M <sub>1</sub>                                            | P4 major                | G111 N7, 3.75 Å                                                              | n.a.                                                                                                                          | G111 O6, 4.19 Å                                                              | n.a.                                                                                                                          |                                   |
| M <sub>2</sub>                                            | Bridging J4/5 and J6/7  | A207 OP1*, 2.07 Å<br>C262 OP1, 2.03 Å                                        | A207-M-C262, 145°                                                                                                             | A207 OP1, 2.05 Å<br>C262 OP1, 2.49 Å                                         | A207-M-C262, 142°                                                                                                             |                                   |
| M <sub>3</sub>                                            | P5 major groove         | G116 O6, 3.61 Å                                                              | n.a.                                                                                                                          | A114 OP2, 3.05 Å                                                             | n.a.                                                                                                                          | 1GID,<br>1HR2,<br>1U6B            |
| <b>Metal core</b>                                         |                         |                                                                              |                                                                                                                               |                                                                              |                                                                                                                               |                                   |
| M <sub>4</sub>                                            | P5a A-rich bulge        | A184 OP1, 1.86 Å<br>A186 OP1, 2.21 Å<br>A187 OP2, 1.81 Å<br>G188 OP2, 2.29 Å | A184-M-G188, 106°<br>A184-M-A186, 80.1°<br>A184-M-A187, 149°<br>A186-M-A187, 80.3°<br>A186-M-G188, 152°<br>A187-M-G188, 81.9° | A184 OP1, 1.80 Å<br>A186 OP1, 1.83 Å<br>A187 OP2, 1.92 Å<br>G188 OP2, 3.45 Å | A184-M-G188, 82.4°<br>A184-M-A186, 91.5°<br>A184-M-A187, 171°<br>A186-M-A187, 88.5°<br>A186-M-G188, 159°<br>A187-M-G188, 101° | 1GID,<br>1HR2,<br>1X8W            |
| M <sub>5</sub>                                            | P5a A-rich bulge        | A183 OP1, 2.30 Å<br>A184 OP2, 2.11 Å<br>A186 OP2, 2.50 Å                     | A183-M-A184, 76.3°<br>A183-M-A186, 98.0°<br>A184-M-A186, 72.9°                                                                | A183 OP1, 2.22 Å<br>A184 OP2, 2.22 Å<br>A186 OP2, 2.24 Å                     | A183-M-A184, 84.1°<br>A183-M-A186, 95.2°<br>A184-M-A186, 76.6°                                                                | 1GID,<br>1HR2                     |
| M <sub>6</sub>                                            | P5a A-rich bulge        | G188 O6, 1.96 Å                                                              | n.a.                                                                                                                          | G188 N7, 3.03 Å                                                              | n.a.                                                                                                                          | 1GID,<br>1HR2                     |
| <b>P5b and tetraloop</b>                                  |                         |                                                                              |                                                                                                                               |                                                                              |                                                                                                                               |                                   |
| M <sub>7</sub>                                            | P5b major groove        | G163 N7, 3.07 Å<br>G164 O6, 2.50 Å                                           | G163-M-G164, 83.9°                                                                                                            | G163 N7, 2.79 Å<br>G164 O6, 1.85 Å                                           | G163-M-G164, 107°                                                                                                             | 1HR2                              |
| M <sub>8</sub>                                            | P5b major groove        | G160 O6, 4.16 Å                                                              | n.a.                                                                                                                          | A139 OP1, 3.77 Å                                                             | n.a.                                                                                                                          |                                   |
| M <sub>9</sub>                                            | P5b major groove        | G148 N7, 3.02 Å                                                              | n.a.                                                                                                                          | G148 O6, 3.67 Å                                                              | n.a.                                                                                                                          | 1GID,<br>1HR2,                    |
| M <sub>10</sub>                                           | L5b GAAA                | G150 OP2, 2.33 Å                                                             | n.a.                                                                                                                          | G149 OP2, 2.46 Å                                                             | n.a.                                                                                                                          |                                   |
| <b>P3-P6</b>                                              |                         |                                                                              |                                                                                                                               |                                                                              |                                                                                                                               |                                   |
| M <sub>11</sub>                                           | Between P3 and P6       | A256 OP1, 2.51 Å<br>U273 OP1, 2.54 Å                                         | A256-M-U273, 89.6°                                                                                                            | A256 OP1, 2.00 Å<br>U273 OP1, 2.53 Å                                         | A256-M-U273, 88.5°                                                                                                            | 1X8W                              |
| M <sub>12</sub>                                           | P3 major groove         | U300 O4, 4.57 Å                                                              | n.a.                                                                                                                          | G276 N7, 4.01 Å                                                              | n.a.                                                                                                                          |                                   |
| M <sub>13</sub>                                           | P6 major groove         | C217 OP2, 4.05 Å                                                             | n.a.                                                                                                                          | C217 OP2, 3.41 Å                                                             | n.a.                                                                                                                          |                                   |
| <b>P6-J6a/6-J6/7-J8/7 cluster close to catalytic site</b> |                         |                                                                              |                                                                                                                               |                                                                              |                                                                                                                               |                                   |
| M <sub>14</sub>                                           | P6 major groove         | U259 N3, 3.31 Å                                                              | n.a.                                                                                                                          | A214 OP2, 2.12 Å                                                             | n.a.                                                                                                                          | 1HR2                              |
| M <sub>15</sub>                                           | Bridging J6a/6 and J8/7 | G257 OP1, 2.34 Å<br>U258 OP2, 2.28 Å<br>C260 O2, 3.28 Å<br>U305 OP2, 2.47 Å  | G257-M-U305, 94.8°<br>G257-M-U258, 81.1°<br>G257-M-C260, 143°<br>U258-M-U305, 114°<br>U258-M-C260, 119°<br>C260-M-U305, 103°  | G257 OP1, 2.65 Å<br>U258 OP2, 2.28 Å<br>C260 O2, 2.67 Å<br>U305 OP2, 2.14 Å  | G257-M-U305, 90.7°<br>G257-M-U258, 73.0°<br>G257-M-C260, 126°<br>U258-M-U305, 105°<br>U258-M-C260, 122°<br>C260-M-U305, 126°  | 1U6B,<br>1Y0Q                     |
| M <sub>16</sub>                                           | Between P6 and J6a/6    | U258 OP1, 2.57 Å                                                             | n.a.                                                                                                                          | U258 OP1, 2.49 Å                                                             | n.a.                                                                                                                          | 1U6B                              |
| M <sub>17</sub>                                           | Between J6/7 and P7     | U259 OP2, 2.68 Å                                                             | n.a.                                                                                                                          | U259 OP2, 2.17 Å                                                             | n.a.                                                                                                                          | 1U6B,<br>1Y0Q                     |

|                |                        |                                                                               |                                                                                                                                    |                                      |                    |                        |
|----------------|------------------------|-------------------------------------------------------------------------------|------------------------------------------------------------------------------------------------------------------------------------|--------------------------------------|--------------------|------------------------|
| M18            | J8/7                   | U305 OP1, 2.65 Å                                                              | n.a.                                                                                                                               | U305 OP1, 2.58 Å                     | n.a.               |                        |
| M19            | J8/7                   | A301 OP2, 2.32 Å<br>A302 OP1, 2.45 Å                                          | A301-M-A302, 79.7°                                                                                                                 | A301 OP2, 2.22 Å<br>A302 OP1, 1.81 Å | A301-M-A302, 89.1° |                        |
| M20            | Between P8<br>and P2   | G32 OP1, 4.38 Å                                                               | n.a.                                                                                                                               | A299 O2', 3.88 Å                     | n.a.               |                        |
| M21            | P8 major               | G280 O6, 2.96 Å                                                               | n.a.                                                                                                                               | G281 N7, 4.73 Å                      | n.a.               |                        |
| P14            |                        |                                                                               |                                                                                                                                    |                                      |                    |                        |
| M22            | P14 major<br>groove    | A171 OP2, 2.75 Å                                                              | n.a.                                                                                                                               | A171 OP2, 2.05 Å                     | n.a.               | 1GID,<br>1HR2          |
| M23            | P14 major<br>groove    | A172 OP2, 2.49 Å<br>A173 OP2, 3.20 Å                                          | A172-M-A173, 73.3°                                                                                                                 | A172 OP2, 2.04 Å<br>A173 OP2, 2.60 Å | A172-M-A173, 72.5° | 1GID,<br>1HR2,<br>1X8W |
| M24            | P14 major<br>groove    | A42 O2', 4.01 Å                                                               | n.a.                                                                                                                               | A42 O2', 3.63 Å                      | n.a.               |                        |
| Catalytic site |                        |                                                                               |                                                                                                                                    |                                      |                    |                        |
| M25            | P7 major<br>groove     | G312 N7, 3.80 Å                                                               | n.a.                                                                                                                               | G312 O6, 4.21 Å                      | n.a.               |                        |
| M26            | Between P4<br>and J8/7 | U(-1) O3', 2.41 Å<br>A304 OP1, 2.65 Å<br>A306 OP2, 2.18 Å<br>C208 OP1, 2.54 Å | C208-M-A304, 64.1°<br>C208-M-A306, 88.8°<br>U(-1)-M-C208, 76.6°<br>U(-1)-M-A306, 155°<br>U(-1)-M-A304, 94.9°<br>A304-M-A306, 96.4° | A304 OP1, 2.78 Å<br>A306 OP2, 2.26 Å | A304-M-A306, 64.5° | 1U6B,<br>1X8W,<br>1Y0Q |
| M27            | P7 major<br>groove     | G414 O2', 1.50 Å<br>C262 OP2, 2.53 Å<br>A306 OP1, 2.44 Å                      | G414-M-C262, 80.7°<br>C262-M-A306, 95.4°<br>G414-M-A306, 95.5°                                                                     | n.a.                                 | n.a.               | 1U6B                   |
| M28            | P7 major<br>groove     | U307 OP2, 2.26 Å<br>A308 OP2, 2.28 Å                                          | U307-M-A308, 94.3°                                                                                                                 | U307 OP2, 2.20 Å<br>A308 OP2, 2.21 Å | U307-M-A308, 91.2  | 1U6B,<br>1Y0Q          |
| P1-P2-P2.1     |                        |                                                                               |                                                                                                                                    |                                      |                    |                        |
| M29            | Between P1<br>and P2.1 | A94 OP1, 2.76 Å                                                               | n.a.                                                                                                                               | n.a.                                 | n.a.               |                        |
| M30            | Between P1<br>and P2   | A28 OP2, 2.25 Å                                                               | n.a.                                                                                                                               | n.a.                                 | n.a.               |                        |
| M31            | P2.1 major<br>groove   | G91 O6, 3.26 Å                                                                | n.a.                                                                                                                               | n.a.                                 | n.a.               |                        |

\*OP1 normally indicates *pro-S* oxygen, whereas OP2 normally indicates *pro-R* oxygen in nucleic acids.
